# Supplementary material
Source: PubMed Central journal article supplement (PMC3752660)
Supplement: NIHMS489585-supplement-Supp_Fig_S1-S10_Table_S1-S2.pdf [file NIHMS489585-supplement-Supp_Fig_S1-S10_Table_S1-S2.pdf]

**Table S1. Plasmids used in this work.**

| Plasmids  | Relevant genotype and/or information                                                                                                                               | Ref.                                  |
|-----------|--------------------------------------------------------------------------------------------------------------------------------------------------------------------|---------------------------------------|
| pET24a(+) | Phagemid vector (Km <sup>r</sup> <i>lacZ'</i> ) for expression of recombinant proteins under control of strong transcription and translation signals               | Novagen                               |
| pFR3      | pET24a(+) with <i>Rv3208</i> (o <i>fasR</i> <sub>MT</sub> ) His tag fusion gene, under T7 promoter control, Km <sup>r</sup>                                        | This study                            |
| pMV306    | Single copy integrative vector; inserts into the phage L5 chromosomal integrating site <i>attB</i> in many mycobacteria, Km <sup>r</sup>                           | (Stover, C. K. <i>et al.</i> , 1991)  |
| pJAM2     | <i>Mycobacterium</i> expression vector, carrying inducible acetamidase promoter, <i>oriM</i> , Km <sup>r</sup>                                                     | (Triccas, J. A. <i>et al.</i> , 1998) |
| pFR9      | <i>fasR</i> <sub>MT</sub> His tag fusion gene under acetamidase promoter control in pJAM2, Km <sup>r</sup>                                                         | This study                            |
| pPR27     | <i>E. coli-Mycobacterium</i> shuttle vector, <i>oriM</i> temp <sup>s</sup> , <i>sacB</i> , <i>xylE</i> , Gm <sup>r</sup>                                           | (Pelicic, V. <i>et al.</i> , 1997)    |
| pFR20     | pPR27 derivative carrying P <sub>ptr</sub> -5' <i>fasR</i> <sub>MS</sub>                                                                                           | This study                            |
| pFRA42B   | pFRA40 derivative; P <sub>smyc</sub> - <i>tetR</i> (→); P <sub>furA102</sub> - <i>tetO-pip</i> (→); P <sub>ptr</sub> - <i>lacZ</i> ; <i>int</i> ; Str <sup>r</sup> | (Boldrin, F. <i>et al.</i> , 2010)    |
| pSM128    | <i>Mycobacterium</i> integrative promoter-probe vector, carrying the mycobacteriophage L5 integrase gene, attachment sites, Str <sup>r</sup>                       | (Dussurget, O. <i>et al.</i> , 1999)  |
| pFR47     | pSM128 derivative carrying a transcriptional fusion of P <i>fas</i> <sub>MT</sub> to a promoterless <i>lacZ</i> , Str <sup>r</sup>                                 | This study                            |
| pFR48     | pSM128 derivative carrying a transcriptional fusion of mutated P <i>fas</i> <sub>MT</sub> (Mut1) to a promoterless <i>lacZ</i> , Str <sup>r</sup>                  | This study                            |
| pFR49     | pSM128 derivative carrying a transcriptional fusion of mutated P <i>fas</i> <sub>MT</sub> (Mut2) to a promoterless <i>lacZ</i> , Str <sup>r</sup>                  | This study                            |
| pFR50     | pSM128 derivative carrying a transcriptional fusion of mutated P <i>fas</i> <sub>MT</sub> (Mut3) to a promoterless <i>lacZ</i> , Str <sup>r</sup>                  | This study                            |
|           |                                                                                                                                                                    |                                       |

Gm<sup>r</sup>, gentamicin resistance; Km<sup>r</sup>, kanamycin resistance; Str<sup>r</sup>, streptomycin/spectinomycin resistance; Apra<sup>r</sup>, apramycin resistance

**Table S2. Bacterial strains used in this work.**

| Strain                                  | Comments                                                                                                                                           |                                       |
|-----------------------------------------|----------------------------------------------------------------------------------------------------------------------------------------------------|---------------------------------------|
| DH5 $\alpha$                            | <i>E. coli</i> K12 F- $\Delta$ lacU169 ( $\phi$ 80lacZ $\Delta$ M15) <i>endA1 recA1 hsdR17 deoR supE44 thi-1<math>\lambda</math>- gyrA96 relA1</i> | (Hanahan, D., 1983)                   |
| BL21 $\lambda$ (DE3) Codon Plus         | <i>E. coli</i> B F- <i>ompt hsdS (rB- mB-) dcm+ TetR gal (DE3)endA Hte [argU ileY leuW ], CmR]</i>                                                 | Stratagene                            |
| <i>M. smegmatis</i> mc <sup>2</sup> 155 | Electroporation-proficient <i>ept</i> mutant of <i>M. smegmatis</i> strain mc26                                                                    | (Snapper, S. B. <i>et al.</i> , 1990) |
| <i>M. tuberculosis</i> H37Rv            | Wild type, virulent strain                                                                                                                         | (Cole, S. T. <i>et al.</i> , 1998)    |
| MSpFR47                                 | <i>M. smegmatis</i> mc <sup>2</sup> 155 harboring pFR47, Str <sup>r</sup>                                                                          | This study                            |
| MSpSM128                                | <i>M. smegmatis</i> mc <sup>2</sup> 155 harboring pSM128, Str <sup>r</sup>                                                                         | This study                            |
| MSpFR9                                  | <i>M. smegmatis</i> mc <sup>2</sup> 155 harboring pFR9, Km <sup>r</sup>                                                                            | This study                            |
| MSpSM128 pFR9                           | <i>M. smegmatis</i> mc <sup>2</sup> 155 harboring pSM128 and pFR9, Str <sup>r</sup> Km <sup>r</sup>                                                | This study                            |
| MSpFR47 pFR9                            | <i>M. smegmatis</i> mc <sup>2</sup> 155 harboring pFR47 and pFR9, Str <sup>r</sup> Km <sup>r</sup>                                                 | This study                            |
| MSpFR48 pFR9                            | <i>M. smegmatis</i> mc <sup>2</sup> 155 harboring pMR48 and pFR9, Str <sup>r</sup> Km <sup>r</sup>                                                 | This study                            |
| MSpFR49 pFR9                            | <i>M. smegmatis</i> mc <sup>2</sup> 155 harboring pMR49 and pFR9, Str <sup>r</sup> Km <sup>r</sup>                                                 | This study                            |
| MSpFR50 pFR9                            | <i>M. smegmatis</i> mc <sup>2</sup> 155 harboring pMR50 and pFR9, Str <sup>r</sup> Km <sup>r</sup>                                                 | This study                            |
| MSPtr: <i>fasR</i> <sub>MS</sub>        | <i>M. smegmatis</i> <i>fasR</i> conditional mutant strain harboring pFR20 and pFRA42B, Apra <sup>r</sup> Str <sup>r</sup>                          | This study                            |

Gm<sup>r</sup>, gentamicin resistance; Km<sup>r</sup>, kanamycin resistance; Apra<sup>r</sup>, apramycin resistance; Str<sup>r</sup>, streptomycin/ spectinomycin resistance.

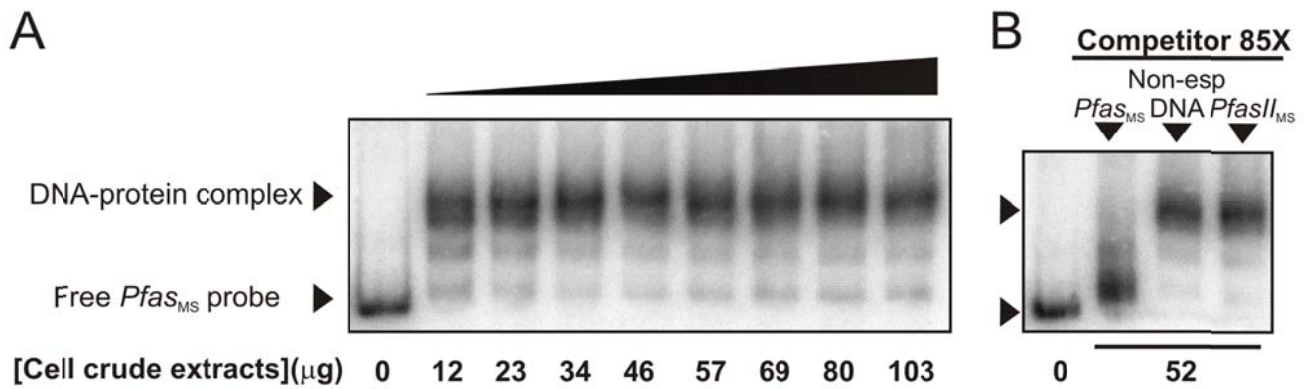

**Figure S1.** Detection of DNA-binding activity to *Pfas<sub>MS</sub>* in extracts of *M. smegmatis* wild type strain mc<sup>2</sup>155.

A. Gel shift assay was performed by incubating the <sup>32</sup>P-labeled 448 bp probe with increasing concentrations (from 0 to 103 µg) of *M. smegmatis* wild type strain mc<sup>2</sup>155 crude extracts from exponential phase cultures, in the presence of poly-dIdC.

B. The specificity of the binding was confirmed by competing labelled *Pfas<sub>MS</sub>* probe with a 85-fold excess of unlabelled *Pfas<sub>MS</sub>* probe or a 85-fold excess of non-related DNA or *PfasII<sub>MS</sub>* probe.

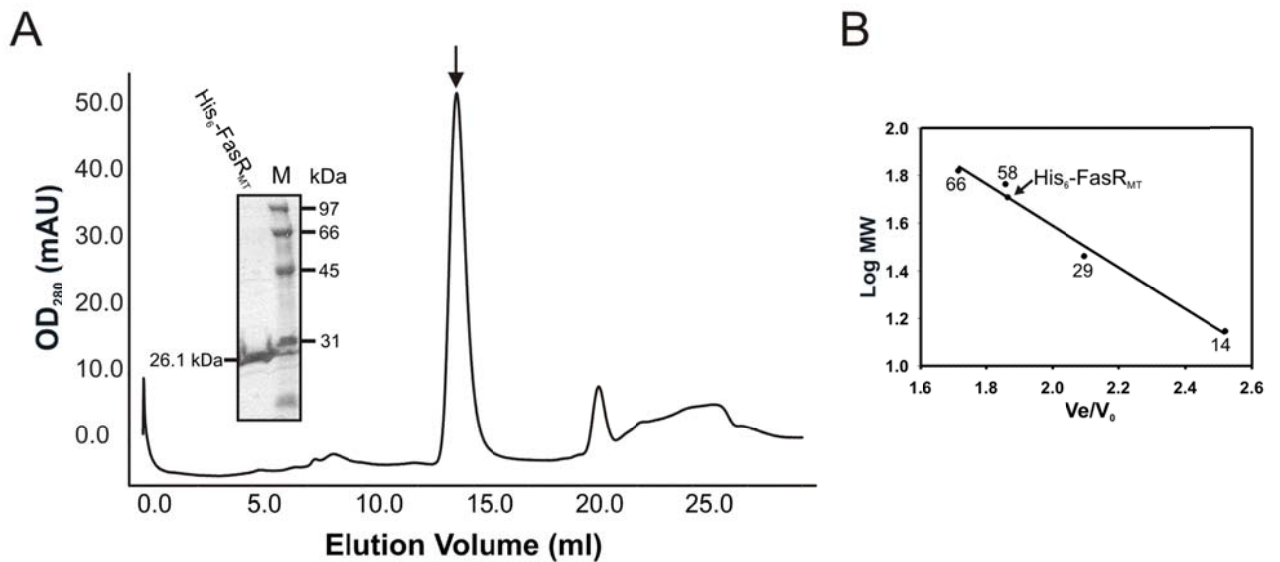

**Figure S2.** FasR is a dimer in solution

A. Gel exclusion chromatographic profile of recombinant FasR<sub>MT</sub>-His<sub>6</sub> run on a Superdex 200 GL column (GE Healthcare). The expected peak of purified FasR<sub>MT</sub>-His<sub>6</sub> was eluted at the position of 14.24 ml (indicated with an arrow). The inset gel is the SDS-PAGE analysis of pure FasR<sub>MT</sub>-His<sub>6</sub>. The apparent molecular weight of FasR<sub>MT</sub>-His<sub>6</sub> is about 26.1 kDa. OD<sub>280</sub>, optical density at 280 nm; mAU, milli-absorbance units.

B. Determination of FasR<sub>MT</sub>-His<sub>6</sub> solution structure according to elution patterns of a series of standard proteins. The standard proteins were lysozyme (~14 kDa), carbonic anhydrase (monomer ~29 kDa; dimer ~58 kDa) and bovine serum albumin (66 kDa). The elution position of FasR<sub>MT</sub>-His<sub>6</sub> is indicated with an arrow. Ve/V<sub>0</sub>, relative elution volume.



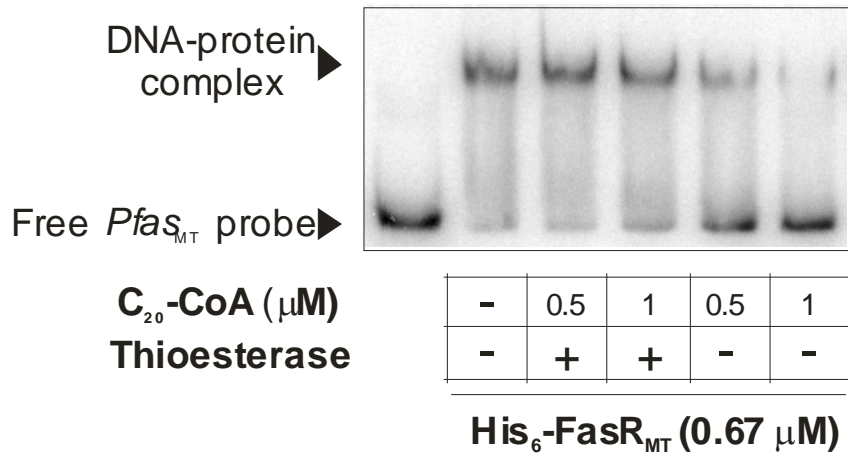

Figure S4. Long chain acyl-CoA inhibition of FasR binding is reversible.

Gel shift assays were performed by incubating the <sup>32</sup>P-labeled 398 bp probe with 0.67 μM of His<sub>6</sub>-FasR<sub>MT</sub> in the absence and in the presence of C<sub>20</sub>-CoA at a final concentration of 0.5 and 1 μM. When indicated, the reaction mix was supplemented with 4 U of *E. coli* thioesterase I. A unit of thioesterase activity is the amount of enzyme required to hydrolyze 1 nmol of acyl-CoA per min at 25 °C. The plasmid for the expression and purification of *E. coli* thioesterase I was the generous gift of Dr. Ana Arabolaza (IBR, Rosario).

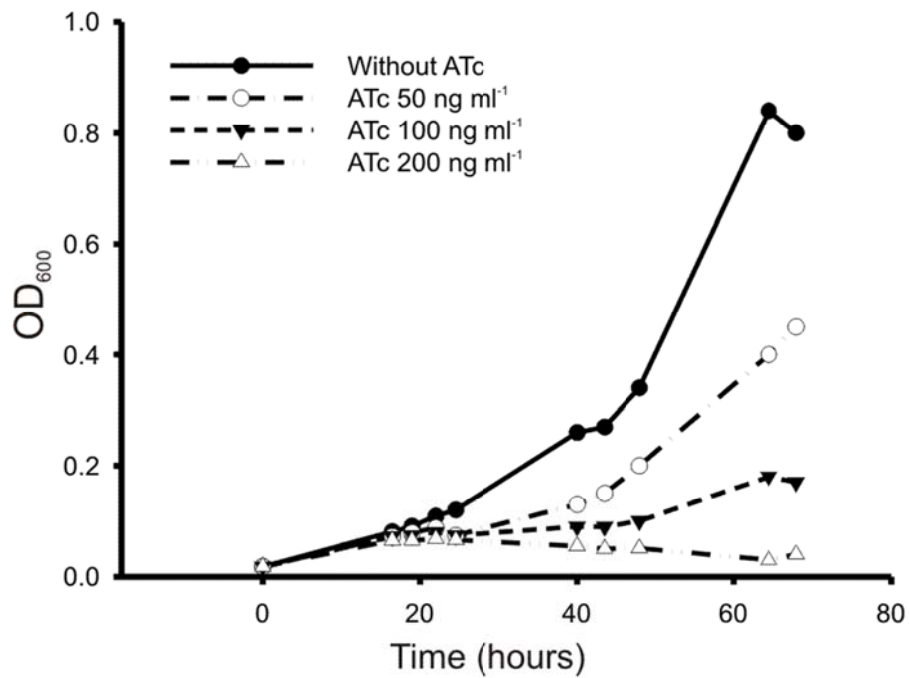

**Figure S5.** FasR is essential for *M. smegmatis* viability

A. Growth curve of strain MSPtr:fasR<sub>MS</sub> incubated at 42 °C in 7H9 medium containing 200 ng ml<sup>-1</sup> ATc (empty triangles), 100 ng ml<sup>-1</sup> ATc (filled triangles), 50 ng ml<sup>-1</sup> ATc (empty circles) or No ATc (filled circles).

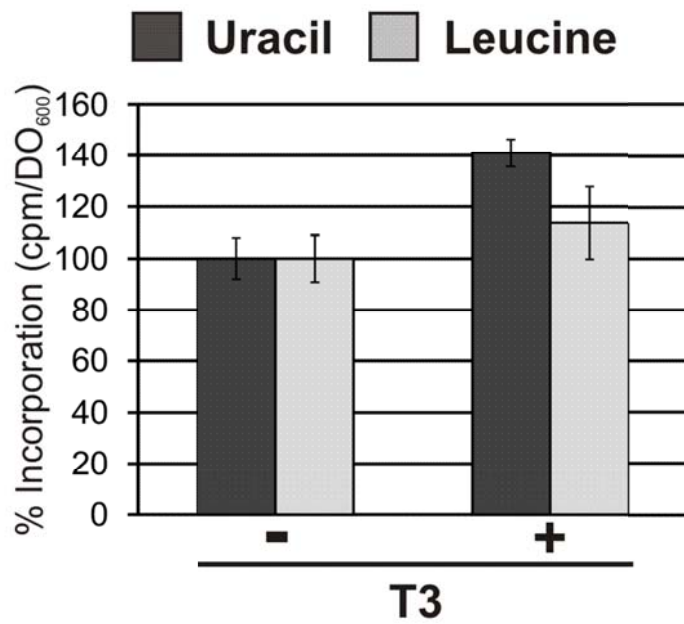

**Figure S6.** Determination of metabolic activity by incorporation of radioactive precursors

Aliquots of 5 ml of *MSPtr:fasR<sub>MS</sub>* cultures with (+) and without (-) ATc 200 ng ml<sup>-1</sup> were labeled for 1 h at T3 with L-[4,5 - <sup>3</sup>H(N)] leucine (60 Ci/mmol) or [5,6 - <sup>3</sup>H] uridine (36 Ci/mmol) (New England Nuclear), at concentrations of 0.5 μCi/ml. Cells were then pelleted, washed three times with Tris-HCl buffer, and resuspended in 1 ml scintillation liquid. Radioactivity was determined in a Beckman scintillation liquid counter. The results were normalized by OD<sub>600nm</sub> and are the average of three independent experiments.



## References

- Boldrin, F., Casonato, S., Dainese, E., Sala, C., Dhar, N., Palu, G., *et al.* (2010) Development of a repressible mycobacterial promoter system based on two transcriptional repressors. *Nucleic Acids Res* **38**: e134.
- Cole, S. T., Brosch, R., Parkhill, J., Garnier, T., Churcher, C., Harris, D., *et al.* (1998) Deciphering the biology of *Mycobacterium tuberculosis* from the complete genome sequence. *Nature* **393**: 537-544.
- Dussurget, O., Timm, J., Gomez, M., Gold, B., Yu, S., Sabol, S. Z., *et al.* (1999) Transcriptional control of the iron-responsive *fxbA* gene by the mycobacterial regulator IdeR. *J Bacteriol* **181**: 3402-3408.
- Hanahan, D. (1983) Studies on transformation of *Escherichia coli* with plasmids. *J Mol Biol* **166**: 557-580.
- Pelicic, V., Jackson, M., Reyrat, J. M., Jacobs, W. R., Jr., Gicquel, B. and Guilhot, C. (1997) Efficient allelic exchange and transposon mutagenesis in *Mycobacterium tuberculosis*. *Proc Natl Acad Sci.U.S.A* **94**: 10955-10960.
- Snapper, S. B., Melton, R. E., Mustafa, S., Kieser, T. and Jacobs, W. R., Jr. (1990) Isolation and characterization of efficient plasmid transformation mutants of *Mycobacterium smegmatis*. *Mol Microbiol* **4**: 1911-1919.
- Stover, C. K., de la Cruz, V. F., Fuerst, T. R., Burlein, J. E., Benson, L. A., Bennett, L. T. *et al.*, (1991) New use of BCG for recombinant vaccines. *Nature* **351**: 456-460.
- Triccas, J. A., Parish, T., Britton, W. J. and Gicquel, B., (1998) An inducible expression system permitting the efficient purification of a recombinant antigen from *Mycobacterium smegmatis*. *FEMS Microbiol.Lett.* **167**: 151-156.
